# Supplementary material
Source: publisher figshare collection journal article supplement (https://acs.figshare.com/ndownloader/files/24955298)
Supplement: Supplementary file 1 [file 24955298]

# MISMATCH REPAIR

## Prokaryotic type

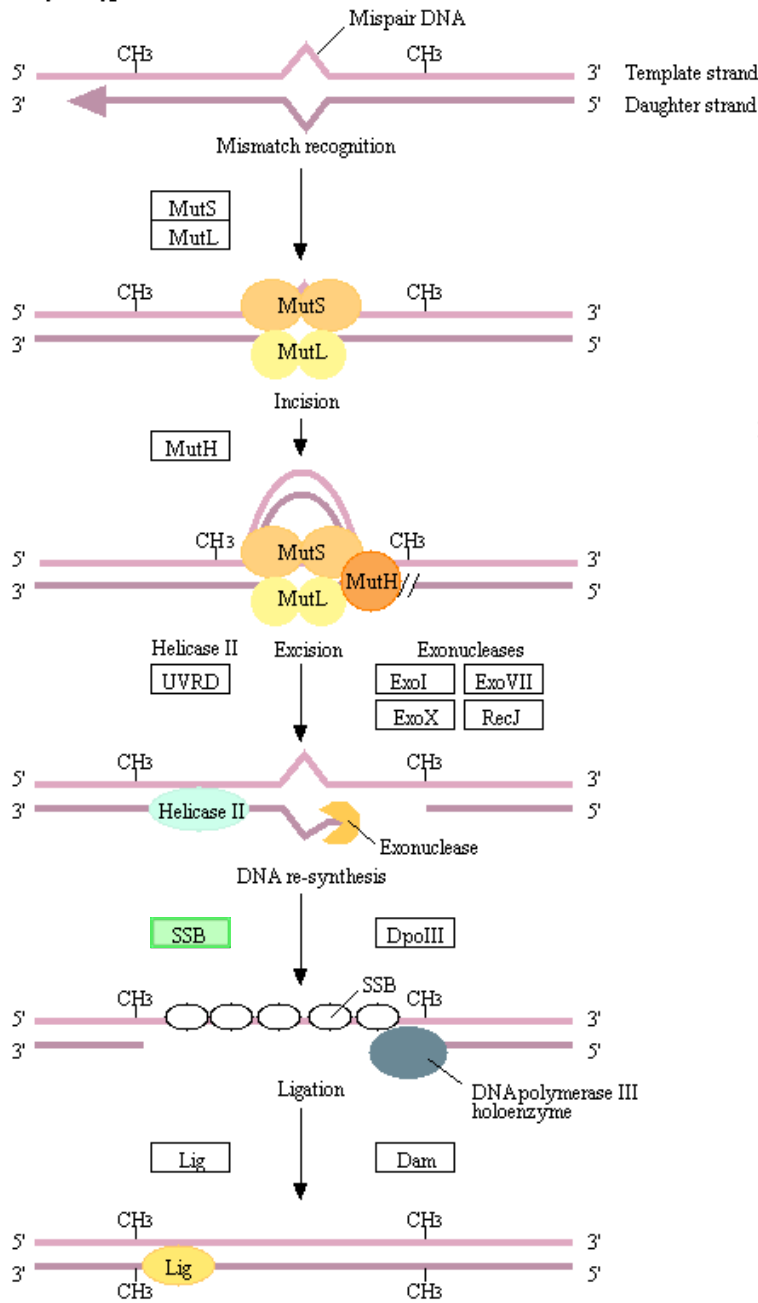

(Escherichia coli)

## Eukaryotic type

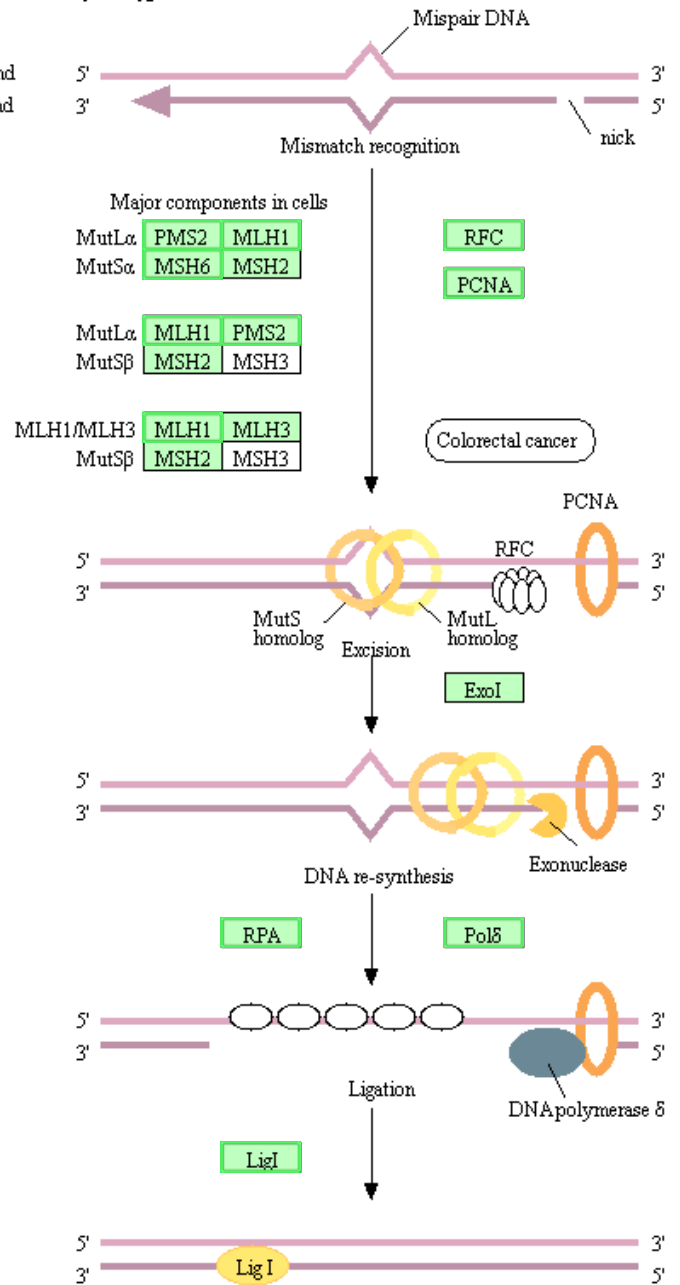

(Human)

Major components in cells

|           |      |      |
|-----------|------|------|
| MutLa     | PMS2 | MLH1 |
| MutSa     | MSH6 | MSH2 |
| MutLα     | MLH1 | PMS2 |
| MutSβ     | MSH2 | MSH3 |
| MLH1/MLH3 | MLH1 | MLH3 |
| MutSβ     | MSH2 | MSH3 |

RFC  
PCNA

Colorectal cancer
