# Supplementary material
Source: publisher figshare collection journal article supplement (https://acs.figshare.com/ndownloader/files/24955298)

# AUTOPHAGY - ANIMAL

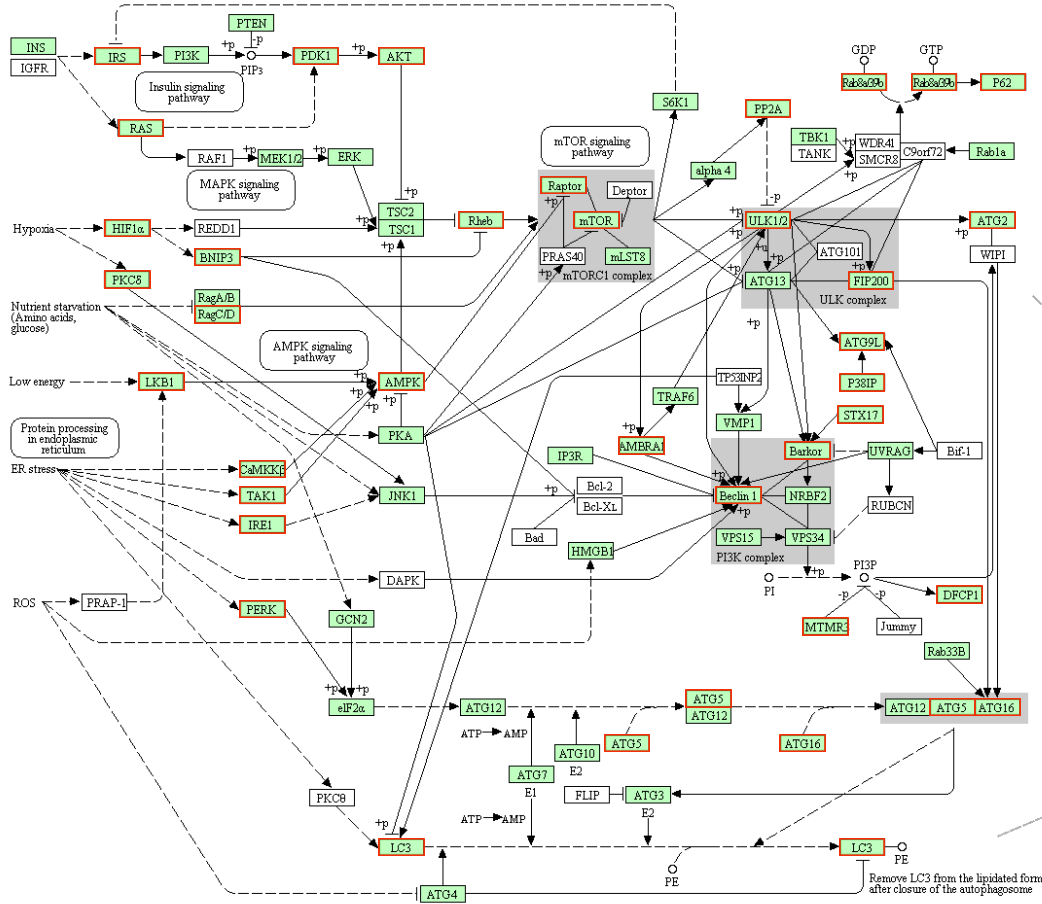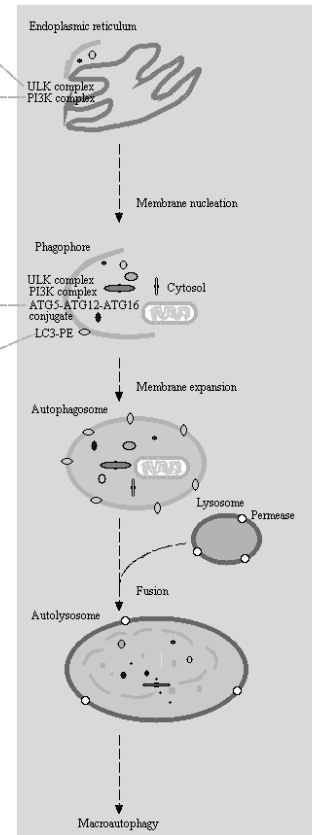

Supplement: Supplementary file 2 [file 24955298]

### Replication complex (Bacteria)

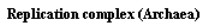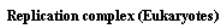

Supplement: Supplementary file 3 [file 24955298]
